# Supplementary material for: Ultralong purely organic aqueous phosphorescence supramolecular polymer for targeted tumor cell imaging
Source: PubMed Central journal article supplement (PMC7494876; doi:10.1038/s41467-020-18520-7), 2020-09-16
Supplement: 41467_2020_18520_MOESM1_ESM.pdf [file 41467_2020_18520_MOESM1_ESM.pdf]

## Supplementary Information

### Ultralong Purely Organic Aqueous Phosphorescence Supramolecular Polymer for Targeted Tumor Cell Imaging

Wei-Lei Zhou<sup>1</sup>, Yong Chen<sup>1</sup>, Qilin Yu<sup>1,2</sup>, Haoyang Zhang<sup>1</sup>, Zhi-xue Liu<sup>1</sup>, Xian-Yin Dai<sup>1</sup>,  
Jing-Jing Li<sup>1</sup>, Yu Liu<sup>1\*</sup>

<sup>1</sup>College of Chemistry, State Key Laboratory of Elemento-Organic Chemistry, Nankai  
University, Tianjin 300071, P. R. China

<sup>2</sup>Key Laboratory of Molecular Microbiology and Technology, College of Life Sciences,  
Nankai University, Tianjin 300071, China.

\*E-mail: yuliu@nankai.edu.cn

### Supplementary Discussion

#### Synthesis of BrBP-NH<sub>2</sub>.

3-Bromopropan-1-amine hydrobromide (0.23 g, 1.00 mmol) was added to a solution of 4-(4-bromophenyl)pyridine (0.47 g, 2.00 mmol) in acetonitrile (50 ml). The solution was heated under reflux for 2 h, during which time a large amount of precipitate formed. The reaction mixture was allowed to cool to room temperature and then filtered, and the obtained solid was washed thoroughly with acetonitrile to afford BrBP-NH<sub>2</sub> as a pale yellow solid (0.15 g, 67%).

<sup>1</sup>H NMR (400 MHz, D<sub>2</sub>O, 25 °C)  $\delta$  8.88 (d,  $J$  = 7.0 Hz, 2H), 8.35 (d,  $J$  = 6.9 Hz, 2H), 7.88–7.82 (m, 4H), 4.75–4.71 (m, 2H), 3.20–3.14 (m, 2H), 2.53–2.40 (m, 2H). <sup>13</sup>C NMR (100 MHz, D<sub>2</sub>O, 25 °C)  $\delta$  156.09, 144.22, 132.78, 131.35, 129.66, 126.69, 125.21, 57.66, 36.17, 28.32.

HRMS (ESI) for  $C_{14}H_{16}Br_2N_2$ : calcd.  $[M-HBr-Br]^+$  : 291.05, found: 291.05.

### Synthesis of HA-BrBP.

1-Ethyl-3-(3-dimethylaminopropyl)carbodiimide (1.68 g, 0.875 mmol) and *N*-hydroxysulfosuccinimide sodium salt (1.9 g, 0.875 mmol) were added to a solution of sodium hyaluronate ( $M_w = 250,000$ , 1.00 g, 0.53  $\mu\text{mol}$ ) in phosphate buffered saline (0.1 M, pH 7.2, 30 mL). The mixture was stirred at 25 °C for 30 min, and then BrBP-NH<sub>2</sub> (1.14 g, 0.25 mmol) in phosphate buffered saline (10 mL) was added. After stirring at room temperature for 24 h, the solution was dialyzed against excess deionized water for 5 days. Freeze-drying afforded HA-BrBP as a white powder. <sup>1</sup>H NMR (400 MHz, D<sub>2</sub>O, TMS)  $\delta$  1.98 (s, 3 H, H of methyl group of HA), 2.84–4.60 (m, H of HA and the alkyl chain of BrBP-NH<sub>2</sub>), 8.84, 8.32, 7.81 (H of the benzene ring of BrBP-NH<sub>2</sub>). Using the single-point method and the integrated peak area of the benzene ring and the HA backbone in the NMR spectrum, we determined the degree of substitution to be 3.5%.

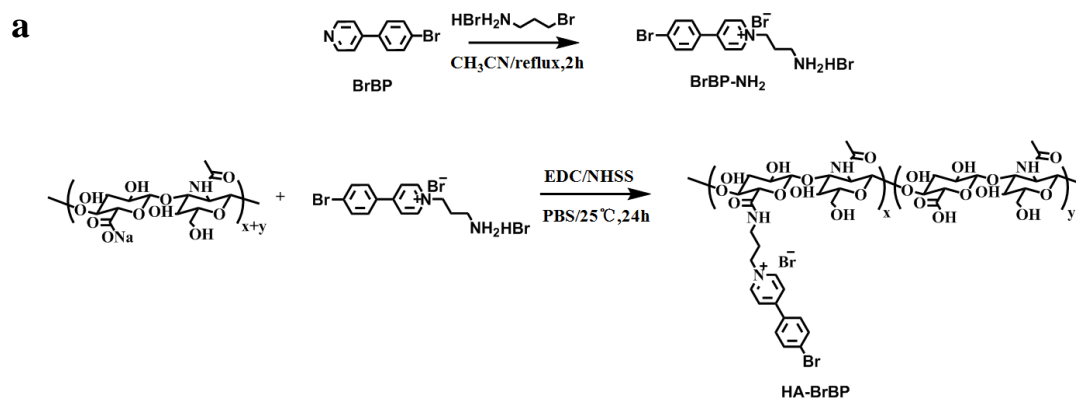

**b**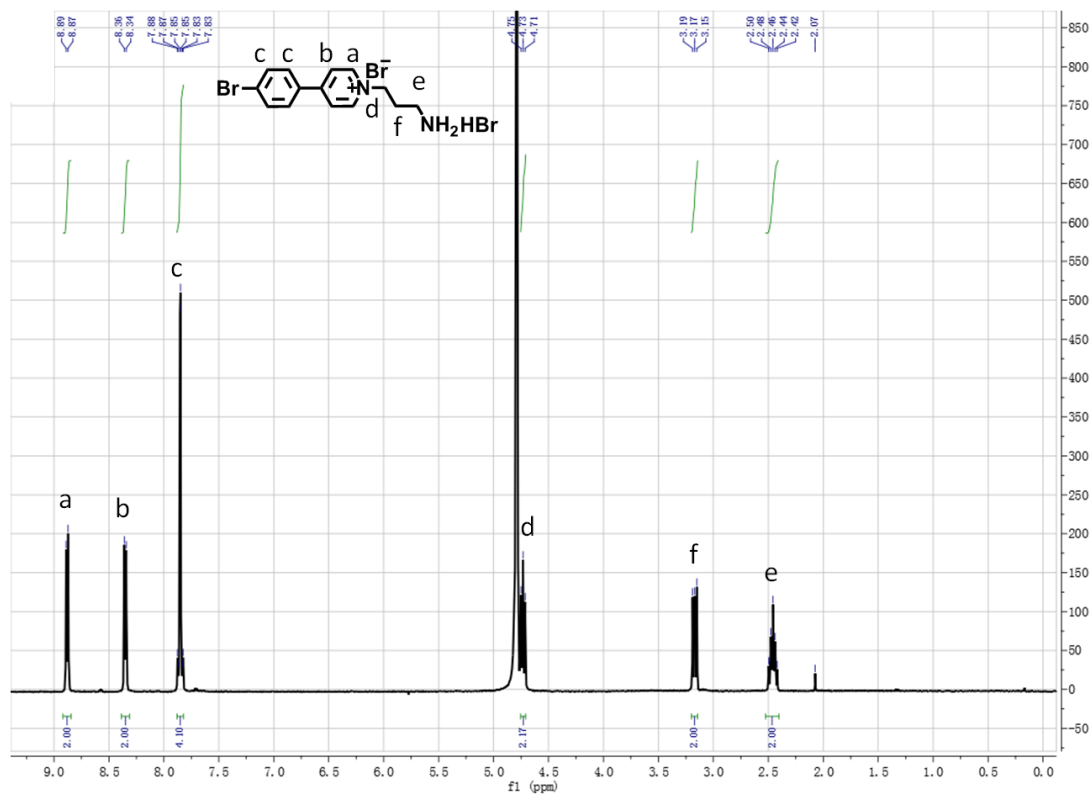**c**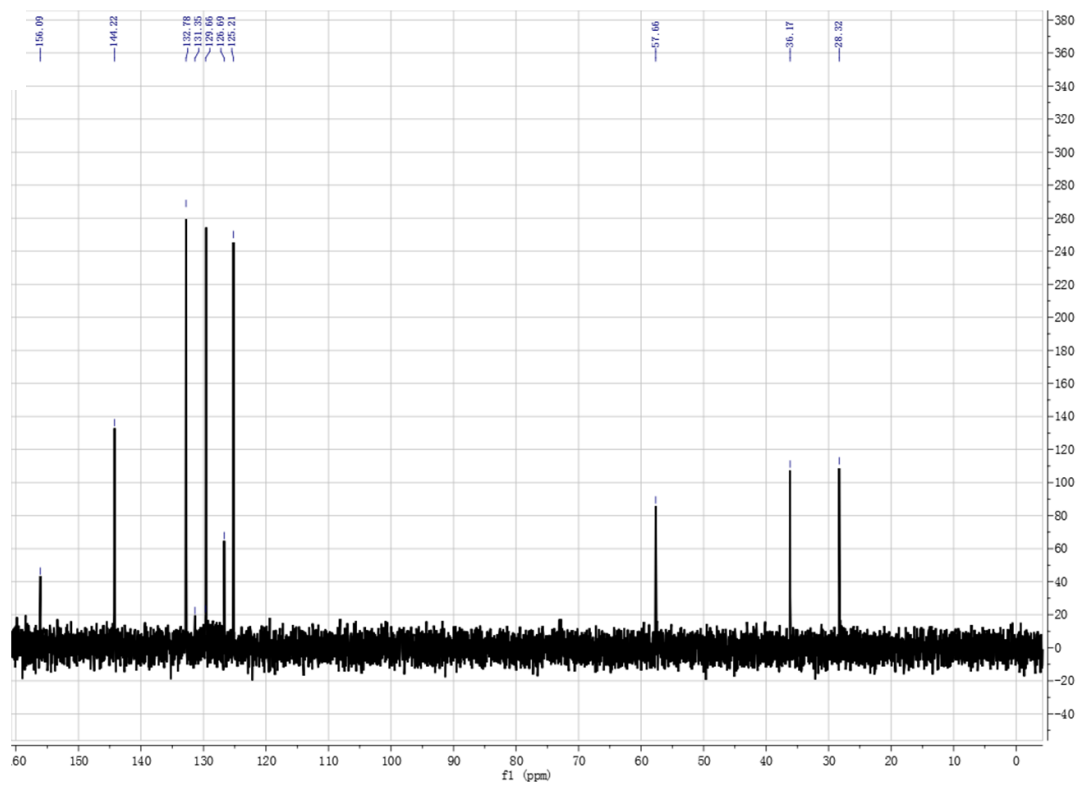**d**

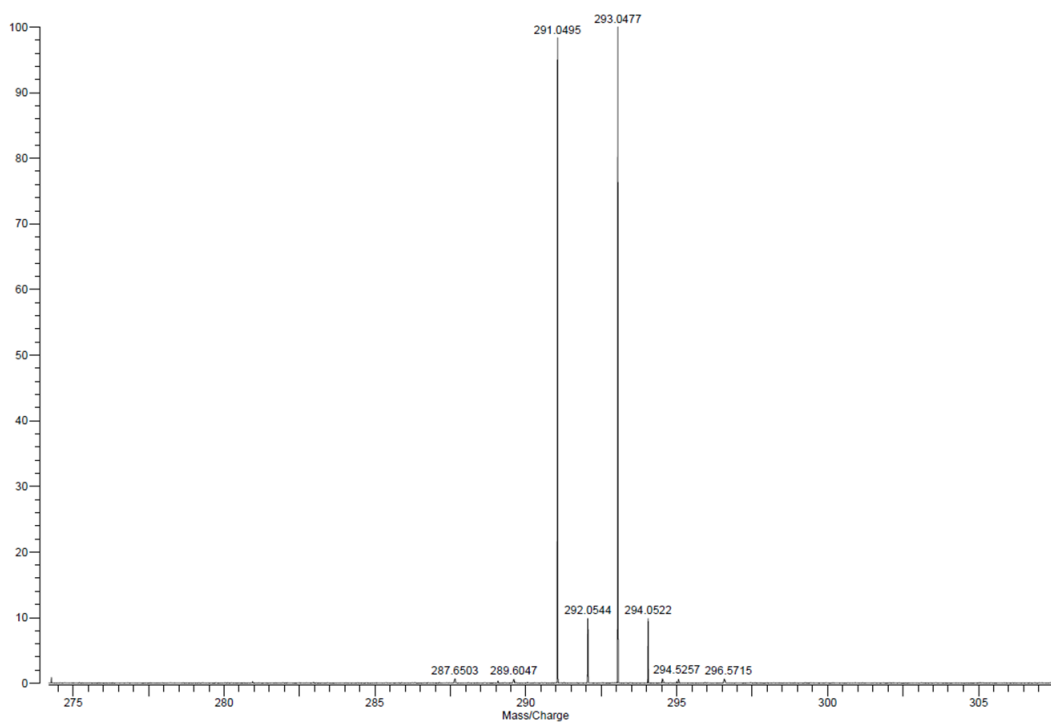

**Supplementary Figure 1. Characterization of BrBP-NH<sub>2</sub>.** (a) Synthetic route of BrBP-NH<sub>2</sub>; (b) <sup>1</sup>H NMR spectrum of BrBP-NH<sub>2</sub> (400 MHz, D<sub>2</sub>O, 25 °C); (c) <sup>13</sup>C NMR spectrum of BrBP-NH<sub>2</sub> (100 MHz, DMSO-*d*<sub>6</sub>, 25 °C); (d) ESI mass spectrum of BrBP-NH<sub>2</sub>.

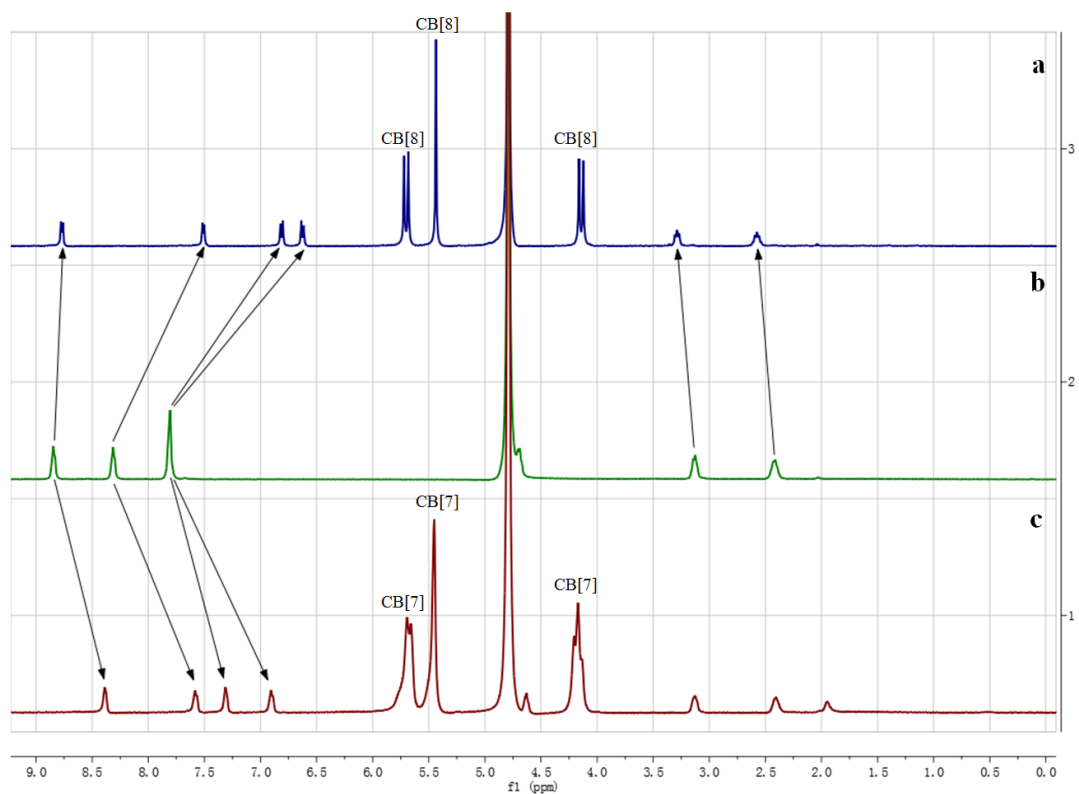

**Supplementary Figure 2.** <sup>1</sup>H NMR spectra of CB[8]/BrBP-NH<sub>2</sub>, BrBP-NH<sub>2</sub>, and CB[7]/BrBP-NH<sub>2</sub>. <sup>1</sup>H NMR spectrum (D<sub>2</sub>O, 400 MHz, 298 K) of (a) CB[8]/BrBP-NH<sub>2</sub> complex, (b) BrBP-NH<sub>2</sub> and (c) CB[7]/BrBP-NH<sub>2</sub> complex.

A

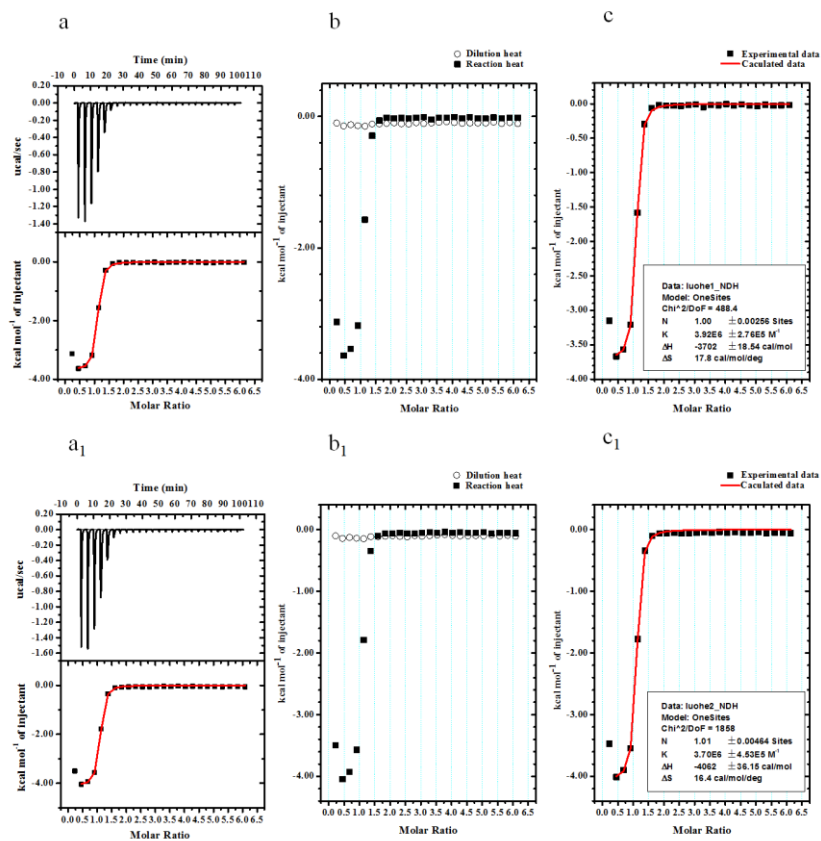

B

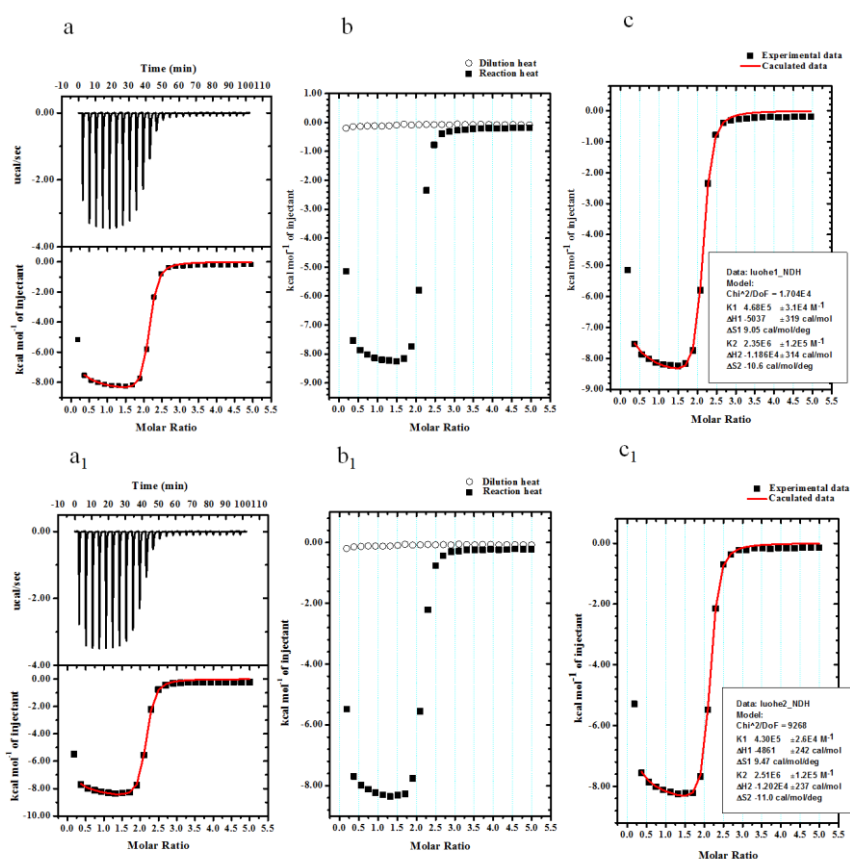

**Supplementary Figure 3. ITC data for CB[7]/BrBP-NH<sub>2</sub> and CB[8]/BrBP-NH<sub>2</sub>**

**complexation.** (A) Calorimetric titrations in aqueous solution for sequential 25 injections (10  $\mu\text{L}$  per injection) of BrBP-NH<sub>2</sub> solution (1.25 mM) injecting into CB[7] solution (0.048 mM):

(a) raw data and apparent reaction heat; (b) heat effects of the dilution and of the complexation reaction; (c) “Net” heat effects fitted using the “one set of binding sites” model.

The thermodynamic data in CB[7]/BrBP-NH<sub>2</sub> complexation were obtained as  $K_S = (3.81 \pm 0.22) \times 10^6 \text{ M}^{-1}$ ,  $-\Delta H = (1.63 \pm 0.15) \times 10^4 \text{ J} \cdot \text{mol}^{-1}$ ,  $T\Delta S = (2.13 \pm 0.18) \times 10^4 \text{ J} \cdot \text{mol}^{-1}$ , and  $-\Delta G = (3.76 \pm 0.01) \times 10^4 \text{ J} \cdot \text{mol}^{-1}$ , respectively;

(B) Calorimetric titrations in aqueous solution for sequential 25 injections (10  $\mu\text{L}$  per injection) of BrBP-NH<sub>2</sub> solution (1.28 mM) injecting into CB[8] solution (0.04 mM): (a) raw data and apparent reaction heat; (b) heat effects of the

dilution and of the complexation reaction; (c) “Net” heat effects fitted using the “1:2 sequential binding sites” model. The thermodynamic data in CB[8]/BrBP–NH<sub>2</sub> complexation were obtained as  $K_{S,1} = (4.49 \pm 0.19) \times 10^5 \text{ M}^{-1}$ ,  $K_{S,2} = (2.43 \pm 0.08) \times 10^6 \text{ M}^{-1}$ ,  $-\Delta H = (7.07 \pm 0.003) \times 10^4 \text{ J}\cdot\text{mol}^{-1}$ ,  $T\Delta S = (1.92 \pm 0.01) \times 10^3 \text{ J}\cdot\text{mol}^{-1}$ , and  $-\Delta G = (6.87 \pm 0.005) \times 10^4 \text{ J}\cdot\text{mol}^{-1}$ , respectively.

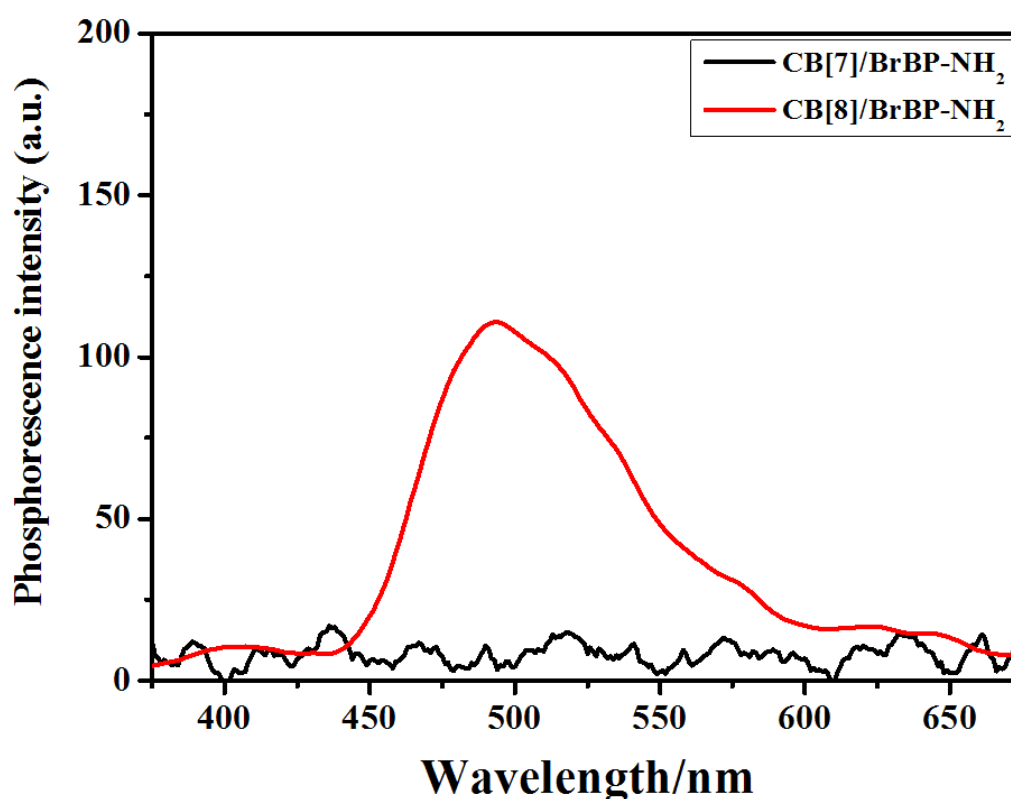

**Supplementary Figure 4. Phosphorescence contrast spectra (delayed 0.2 ms) of CB[7]/BrBP–NH<sub>2</sub> and CB[8]/BrBP–NH<sub>2</sub>.** The phosphorescence spectra (delayed by 0.2 ms) of CB[7]/BrBP–NH<sub>2</sub> (black) and CB[8]/BrBP–NH<sub>2</sub> (red) (BrBP–NH<sub>2</sub> = 0.5 mM, CB[7] = 0.5 mM, CB[8] = 0.25 mM) in water (25 °C,  $\lambda_{\text{ex}} = 320 \text{ nm}$ ) (Ex. Slit = 5 nm, Em. Slit = 5 nm).



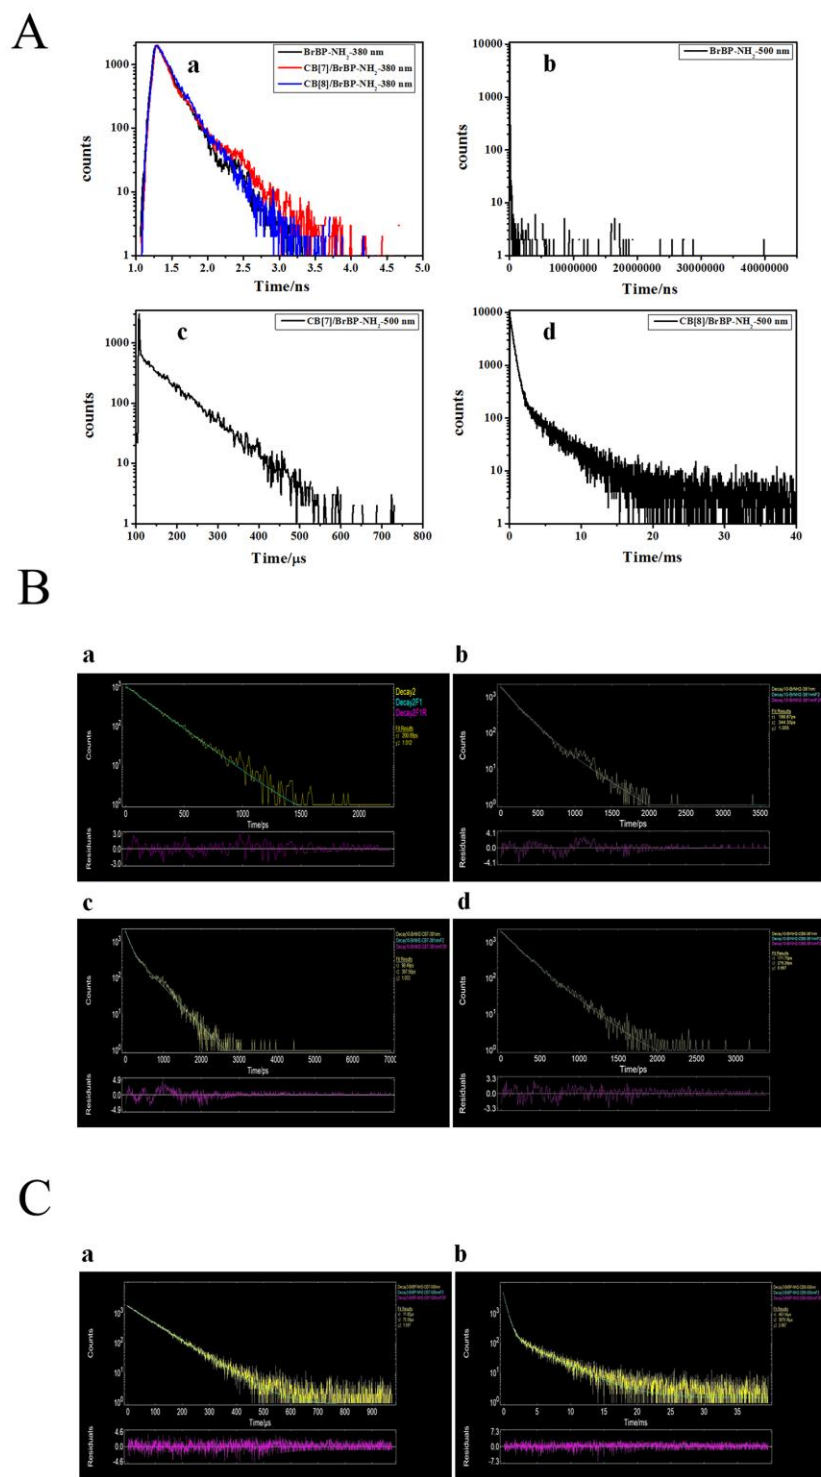

**Supplementary Figure 5. Fluorescence and phosphorescence lifetime contrast curves for CB[7]/BrBP-NH<sub>2</sub> and CB[8]/BrBP-NH<sub>2</sub>.** (A) (a) Fluorescence decay curves of BrBP-NH<sub>2</sub>, CB[7]/BrBP-NH<sub>2</sub> and CB[8]/BrBP-NH<sub>2</sub> at 380 nm at 298 K. Phosphorescence decay curves

of (b) BrBP-NH<sub>2</sub>; (c) CB[7]/BrBP-NH<sub>2</sub> and (d) CB[8]/BrBP-NH<sub>2</sub> at 500 nm at 298 K. (BrBP-NH<sub>2</sub> = 0.5 mM, CB[7] = 0.5 mM, CB[8] = 0.25 mM); **(B)** Fluorescence lifetime decay fitting curve of (a) HA-BrBP (b) BrBP-NH<sub>2</sub>, (c) CB[7]/BrBP-NH<sub>2</sub> and (d) CB[8]/BrBP-NH<sub>2</sub> measured for 380 nm at 298 K. (BrBP-NH<sub>2</sub> = 0.5 mM, CB[7] = 0.5 mM, CB[8]=0.25 mM); **(C)** Phosphorescence lifetime decay fitting curve of (a) CB[7]/BrBP-NH<sub>2</sub> (b) CB[8]/BrBP-NH<sub>2</sub> measured for 500 nm at 298 K. (BrBP-NH<sub>2</sub> = 0.5 mM, CB[7] = 0.5 mM, CB[8] = 0.25 mM).

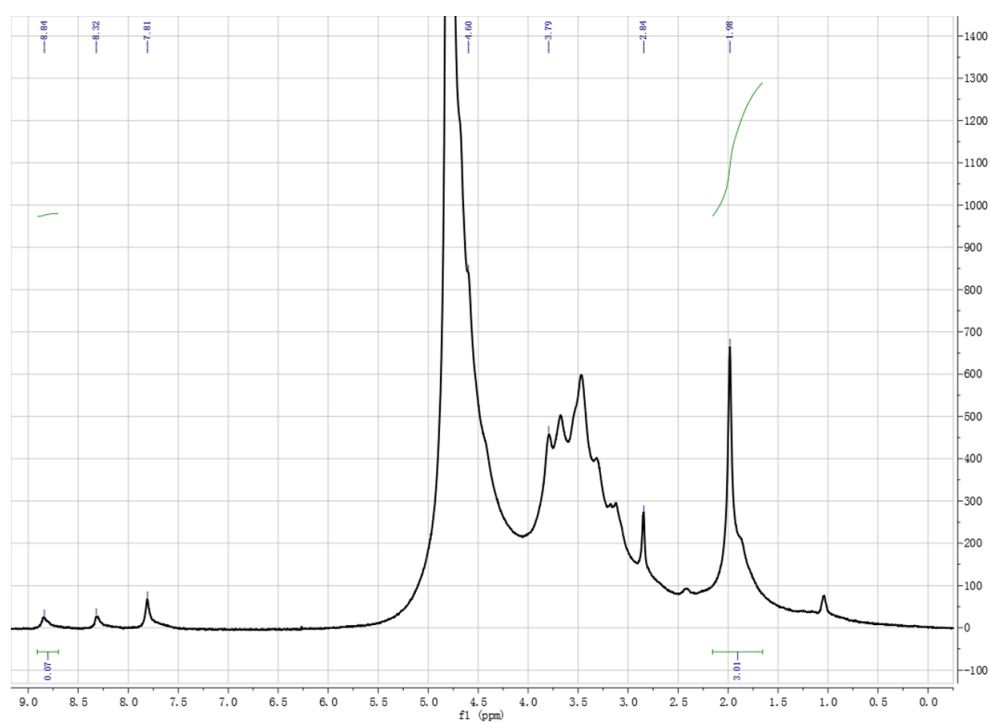

**Supplementary Figure 6.** <sup>1</sup>H NMR spectrum of HA-BrBP. <sup>1</sup>H NMR spectrum of HA-BrBP in D<sub>2</sub>O at 298 K.

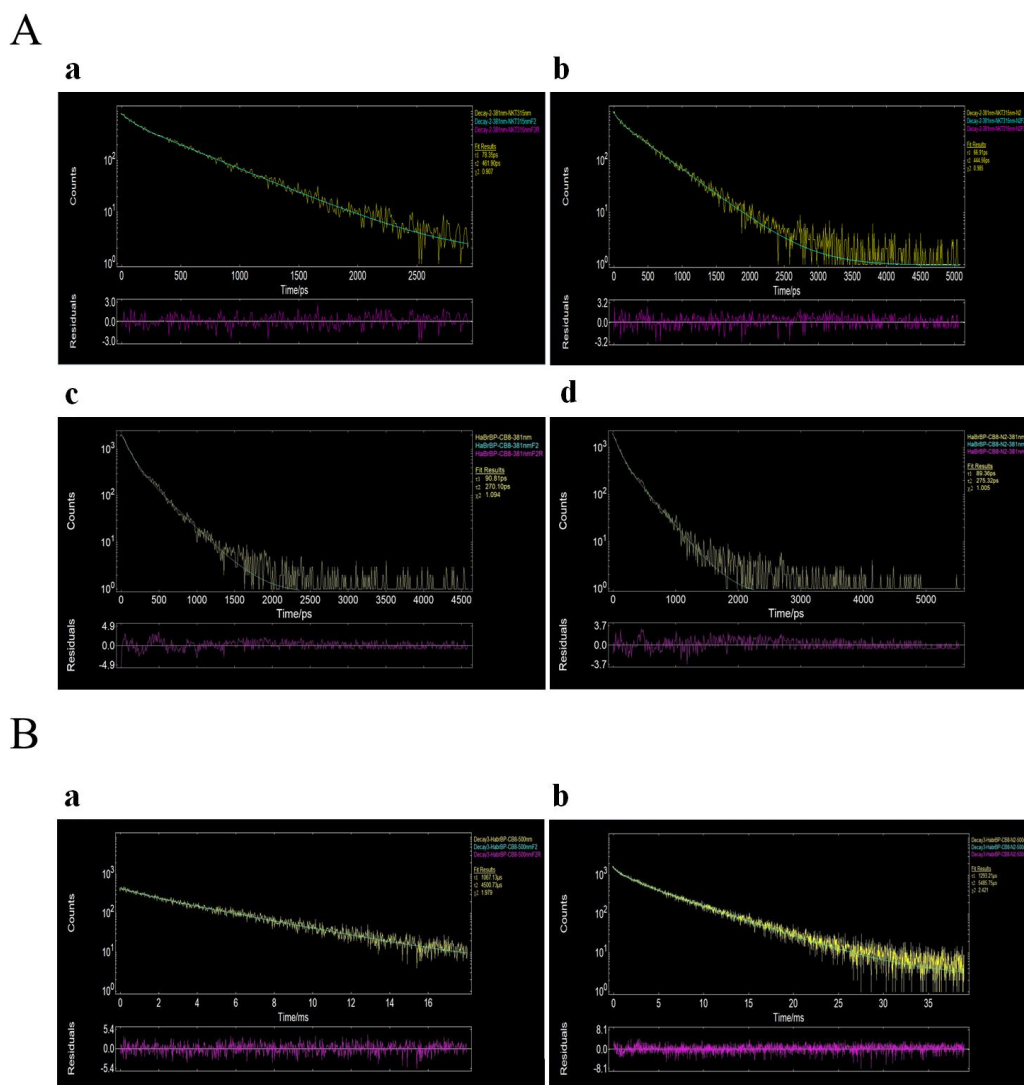

**Supplementary Figure 7. Fluorescence and phosphorescence lifetime decay fitting curves for CB[7]/HA-BrBP and CB[8]/HA-BrBP.** (A) Fluorescence lifetime decay fitting curve of (a) CB[7]/HA-BrBP, (b) CB[7]/HA-BrBP/N<sub>2</sub>, (c) CB[8]/HA-BrBP and (d) CB[8]/HA-BrBP/N<sub>2</sub> measured for 380 nm at 298 K. ([BrBP] = 0.5 mM, [CB7] = 0.5 mM, [CB8] = 0.25 mM); (B) Phosphorescence lifetime decay fitting curve of (a) CB[8]/HA-BrBP (b) CB[8]/HA-BrBP/N<sub>2</sub> measured for 500 nm at 298 K. ([BrBP] = 0.5 mM, [CB8] = 0.25 mM).

**Supplementary Table 1. RTP lifetimes reported in the literature.**

| structure                                                                                                                   | $P\tau$        | literature |
|-----------------------------------------------------------------------------------------------------------------------------|----------------|------------|
|  <p>Rot3</p>                               | 2.5 ms         | Ref.12     |
|  <p>H-NpCzBF<sub>2</sub></p>               | 29.0 $\mu$ s   | Ref.24     |
|  <p>CB[7]<br/>IQC[4-6]</p>                 | 127.38 $\mu$ s | Ref.28     |
|  <p>Pt-TPP-PVP<sub>420</sub></p>           | 7.96 $\mu$ s   | Ref.22     |
|  <p>CB[7]</p>                             | 400 $\mu$ s    | Ref.30     |
|  <p>BrNDI + Laponite clay</p>            | 385 $\mu$ s    | Ref.6      |
|  <p><math>\gamma</math>-Cyclodextrin</p> | 320 $\mu$ s    | Ref.29     |
|  <p>2 Br-phenyl + 2CB[8]</p>             | 190 $\mu$ s    | Ref.31     |

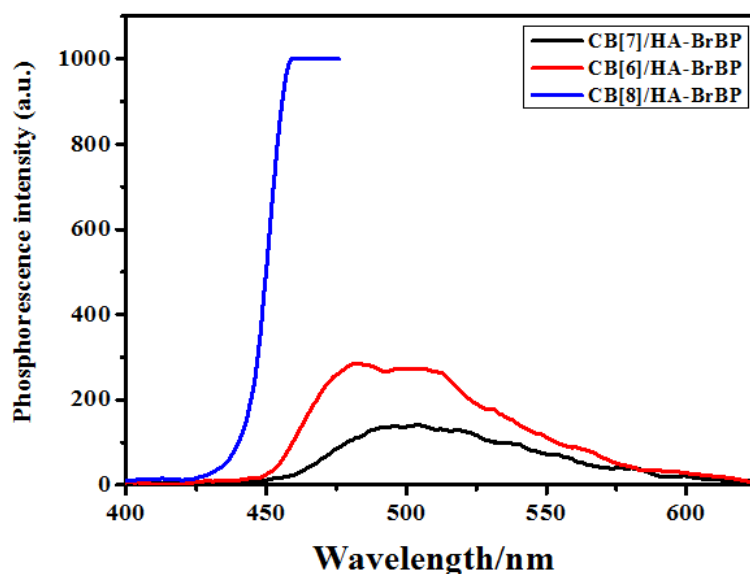

**Supplementary Figure 8. Effect of complexation with CB[6], CB[7] and CB[8] on the spectra of HA-BrBP.** The phosphorescence spectra of CB[6]/HA-BrBP, CB[7]/HA-BrBP and CB[8]/HA-BrBP at 298 K in aqueous solution (delayed by 0.2 ms, Ex. Slit = 10 nm, Em. Slit = 10 nm). ([BrBP] = 0.5 mM, [CB[6]] = 0.5 mM, [CB[7]] = 0.5 mM, [CB[8]] = 0.25 mM).

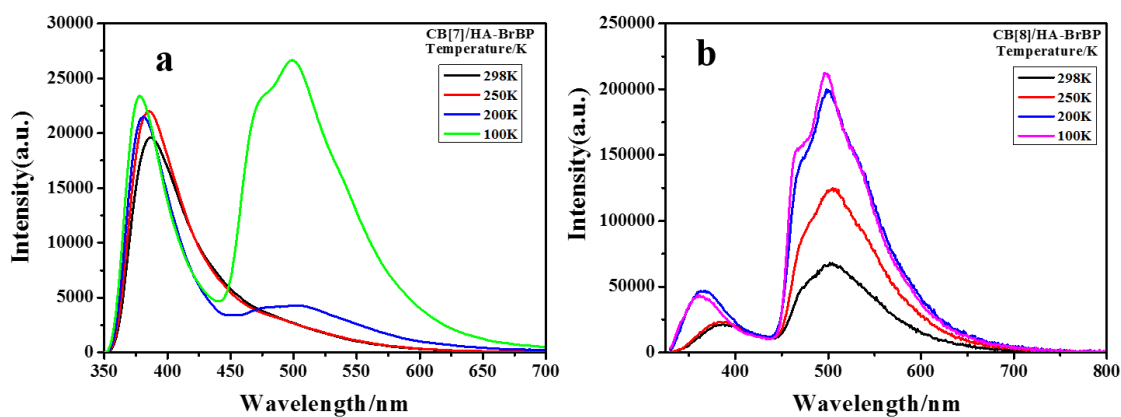

**Supplementary Figure 9. Temperature effect on the photoluminescence spectra of CB[7, 8]/HA-BrBP.** Prompt photoluminescence spectra of (a) CB[7]/HA-BrBP and (b) CB[8]/HA-BrBP in the temperature range from 298 K to 100 K in aqueous solution.

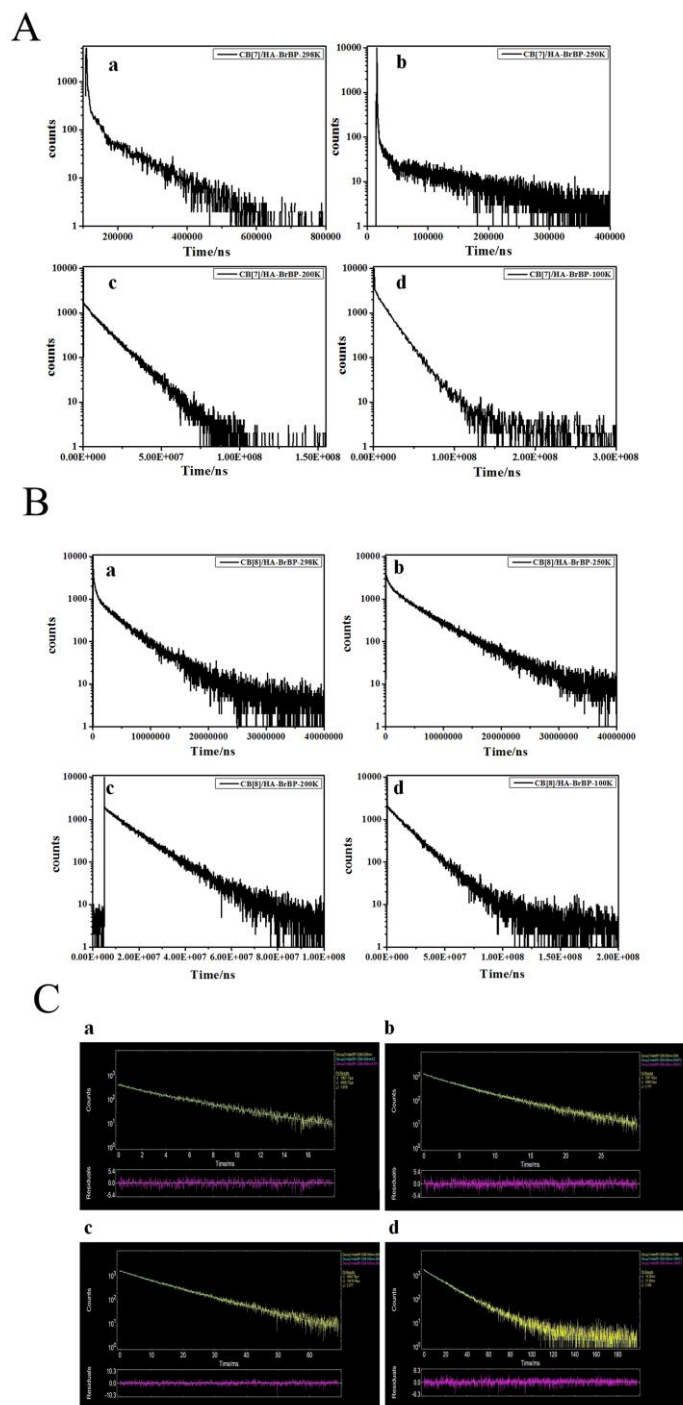

**Supplementary Figure 10. Variable-temperature phosphorescence lifetime contrast curves for CB[7]/HA-BrBP and CB[8]/HA-BrBP. (A) The Phosphorescence lifetime decay curve of CB[7]/HA-BrBP for 500 nm from (a) 298 K; (b) 250 K; (c) 200 K to (d) 100 K. ([BrBP] = 0.5 mM, [CB7] = 0.5 mM); (B) The Phosphorescence lifetime decay fitting curve of CB[8]/HA-BrBP for 500 nm from (a) 298 K; (b) 250 K; (c) 200 K to (d) 100 K.**

([BrBP] = 0.5 mM, [CB8] = 0.25 mM); (C) The Phosphorescence lifetime decay fitting curve of CB[8]/HA–BrBP for 500 nm from (a)298 K; (b) 250 K; (c) 200 K to (d) 100 K. ([BrBP] = 0.5 mM, [CB8] = 0.25 mM).

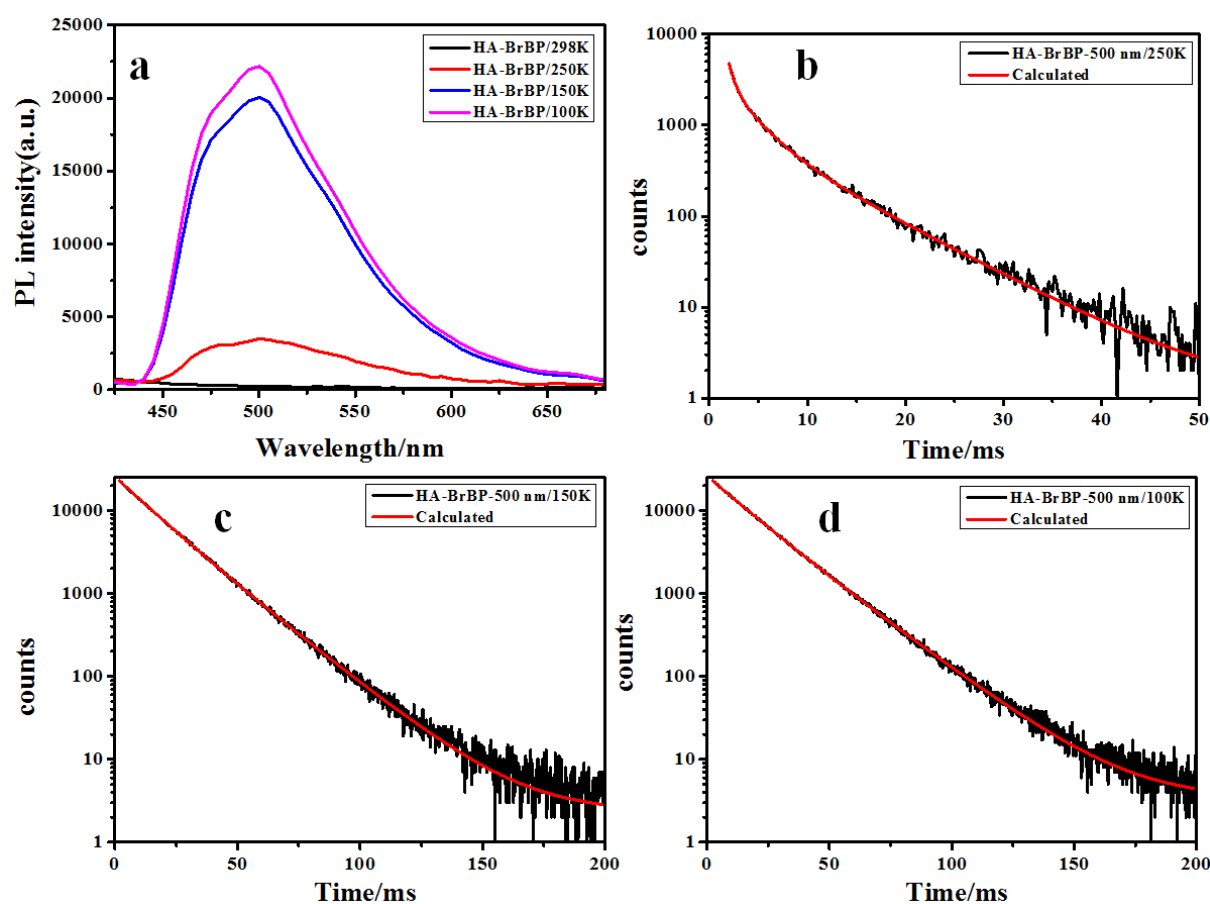

**Supplementary Figure 11. Temperature effect on the photoluminescence spectra and lifetime curves of HA–BrBP.** (a) Prompt photoluminescence spectra of HA–BrBP in the temperature range from 298 K to 100 K in aqueous solution; The Phosphorescence lifetime decay fitting curve of HA–BrBP for at 500 nm from (b) 250 K; (c) 150 K to (d) 100 K. ([BrBP] = 0.5 mM).

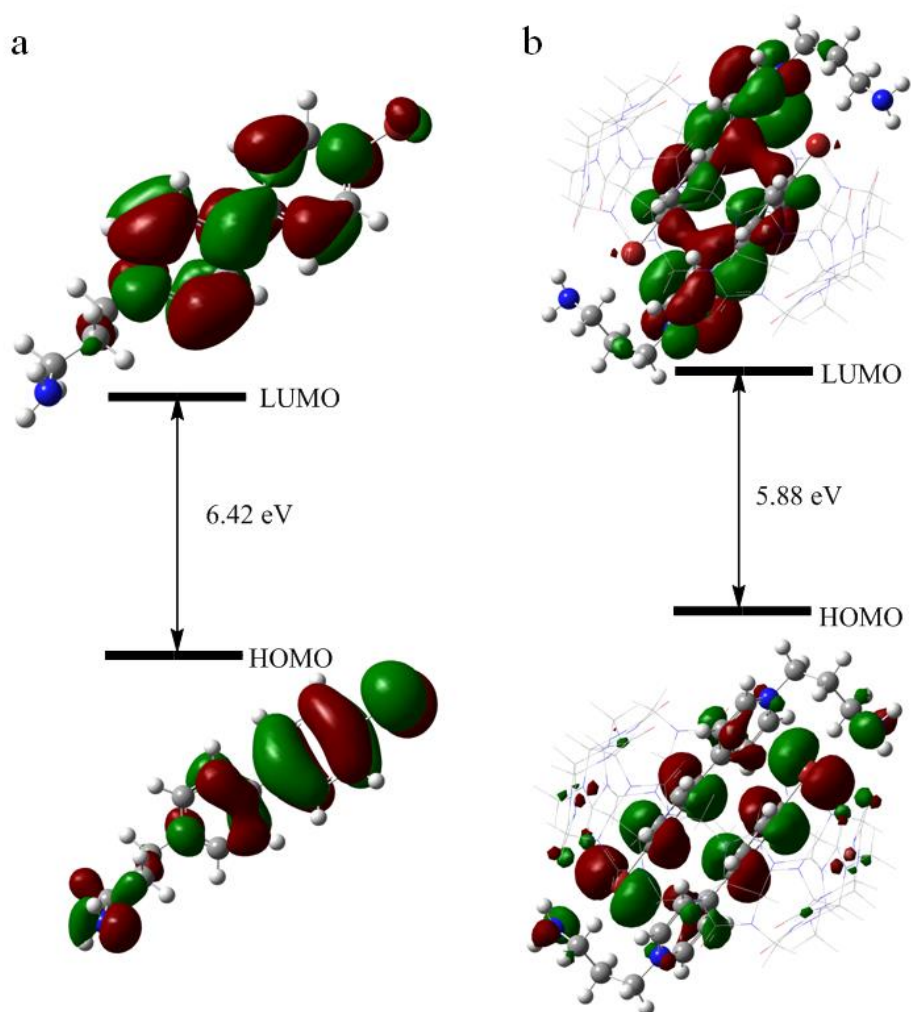

**Supplementary Figure 12. Frontier molecular orbitals and energy gaps.** (a) FMOs and energy gaps of the single guest (SPE=  $-3226.540604$  a.u.); (b) FMOs and energy gaps of the CB[8]/BrBP-NH<sub>2</sub> (SPE=  $-11267.065376$  a.u.).



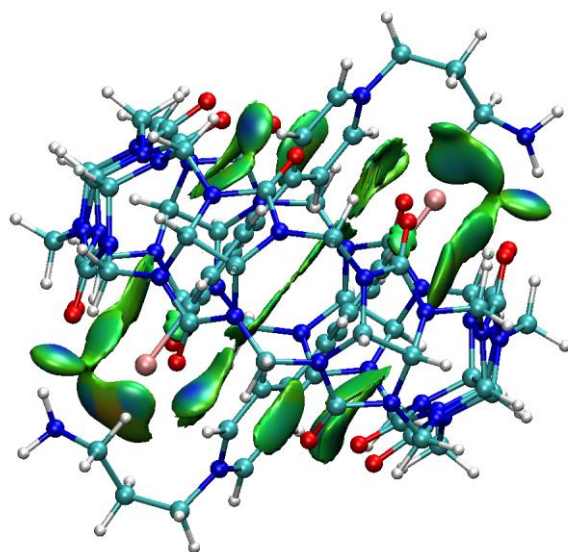

**Supplementary Figure 13. The non-covalent interaction (NCI) analysis.** The non-covalent interaction (NCI) analysis of two same guest molecules and CB[8].(Isosurface value=0.01. The green, blue, and red regions represent the weak, strong, and repulsive interactions, respectively.)

**Supplementary Table 2. Some key Mulliken charge of single molecule and assembly in water at M06-2X-GD3/6-311G(d,p) level.**

|                                                                                     | Number-Atom | Charge in single molecule | Charge in assembly |
|-------------------------------------------------------------------------------------|-------------|---------------------------|--------------------|
| 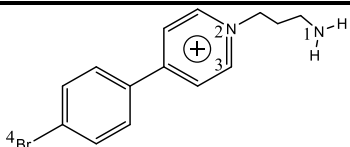 | 1-N         | -0.585                    | -0.558             |
|                                                                                     | 2-N         | -0.393                    | -0.360             |
|                                                                                     | 3-C         | 0.223                     | 0.175              |
|                                                                                     | 4-Br        | 0.003                     | 0.063              |

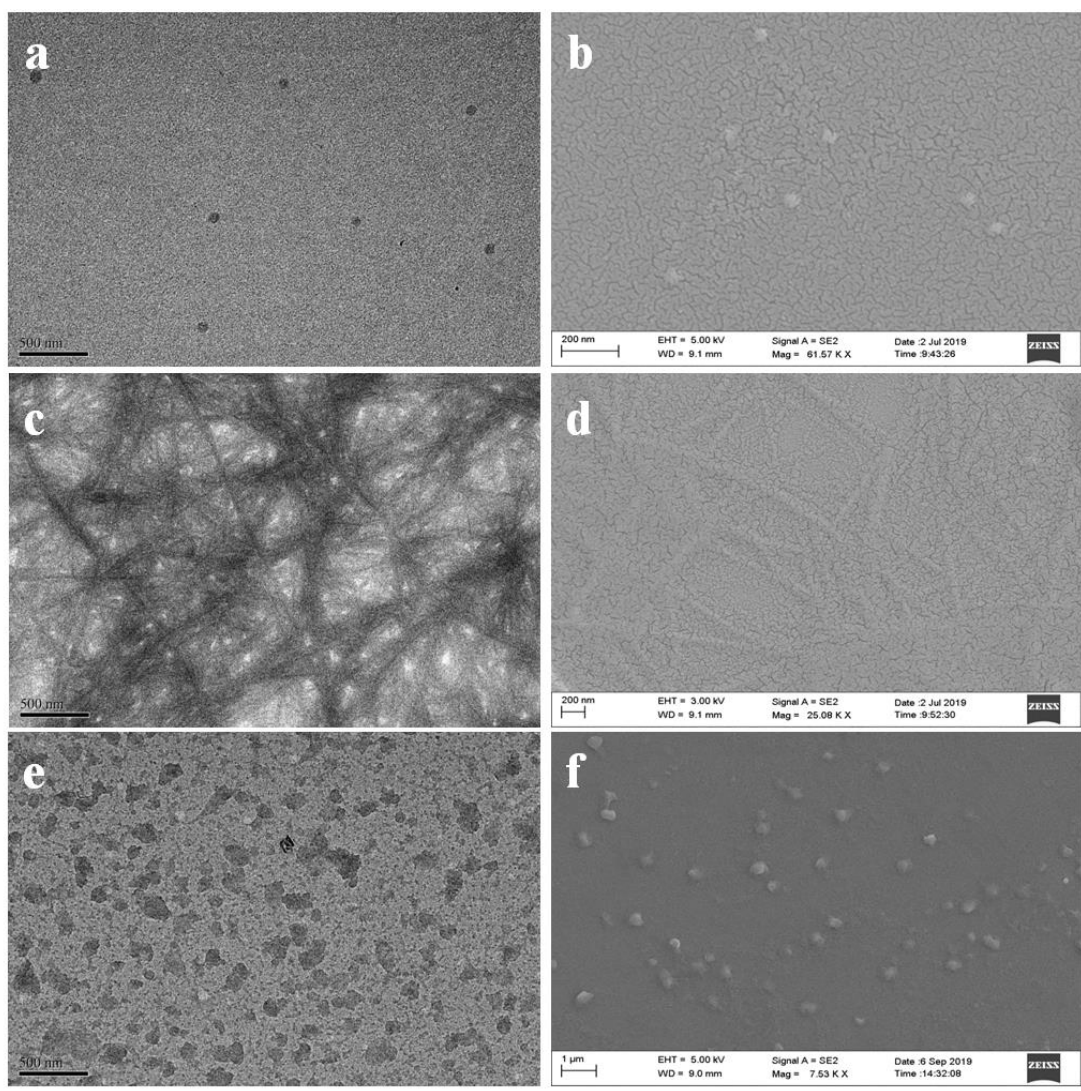

**Supplementary Figure 14. Transmission and scanning electron microscopy images.** TEM image of (a) HA-BrBP, (c) CB[7]/HA-BrBP, (e) CB[8]/HA-BrBP and SEM image of (b) HA-BrBP, (d) CB[7]/HA-BrBP, (f) CB[8]/HA-BrBP.

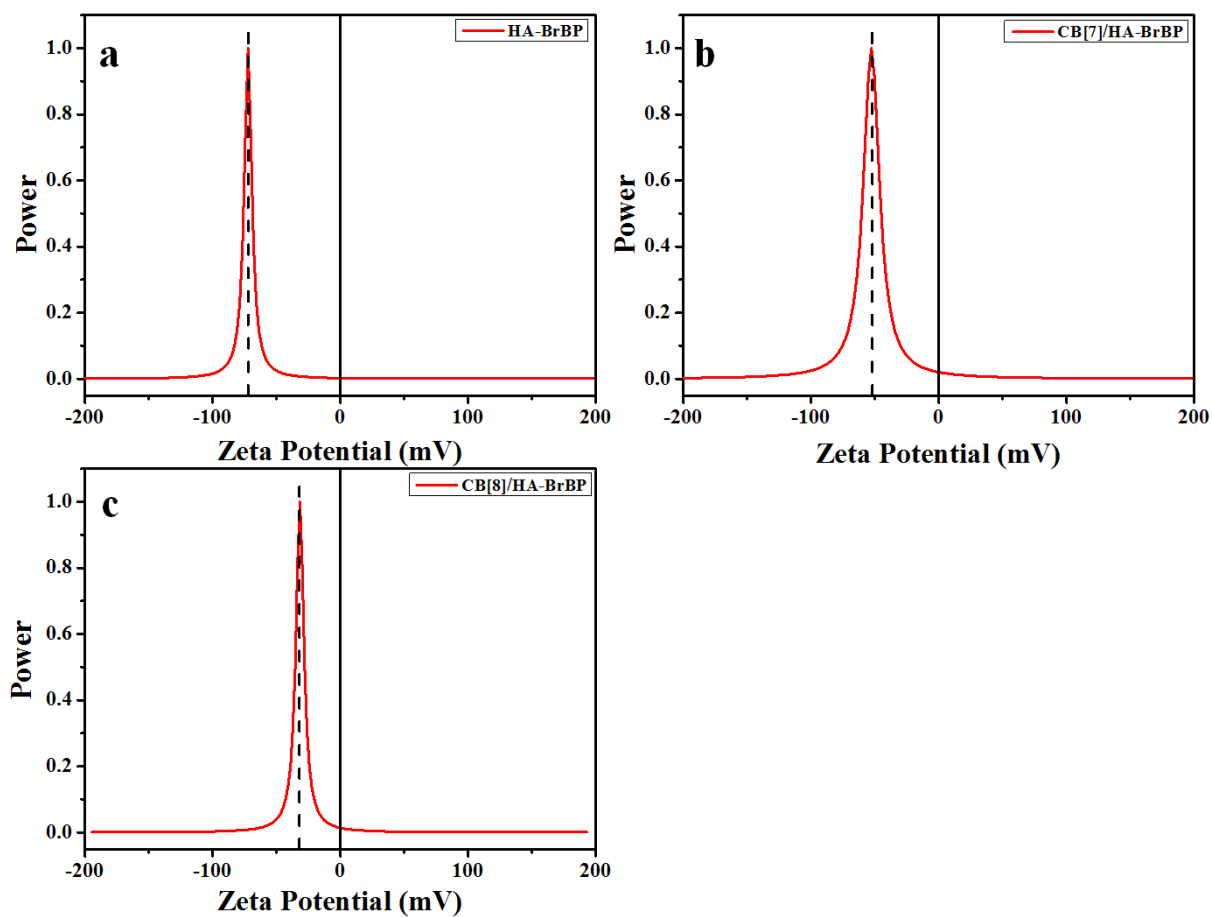

**Supplementary Figure 15. Zeta potential data.** Zeta potential results of (a) HA-BrBP (b) CB[7]/HA-BrBP and (c) CB[8]/HA-BrBP.

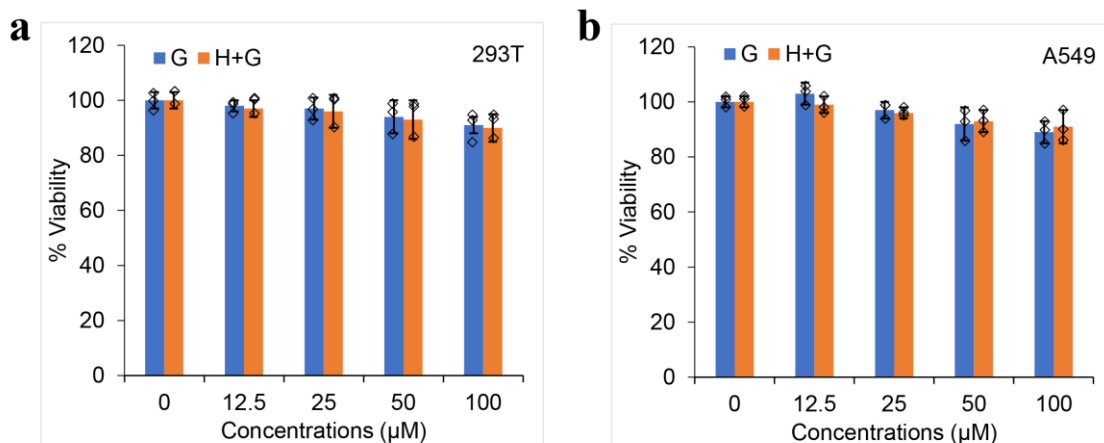

**Supplementary Figure 16. Cytotoxicity assay results for HA–BrBP and CB[8]/HA–BrBP.**

Relative cell viability of HA–BrBP(G) and CB[8]/HA–BrBP(H+G) with different concentrations([BrBP]= 0  $\mu\text{M}$ , 12.5  $\mu\text{M}$ , 25  $\mu\text{M}$ , 50  $\mu\text{M}$ , 100  $\mu\text{M}$ ) at 25  $^{\circ}\text{C}$  in (a) 293T cells, (b) A549 cells.  $n = 3$  independent experiments, with the bar data indicating mean  $\pm$  SD. Noting that there is no significant difference between the G group and the H+G group under each concentration for both 293T and A549 cells ( $P < 0.05$ ).

**a**

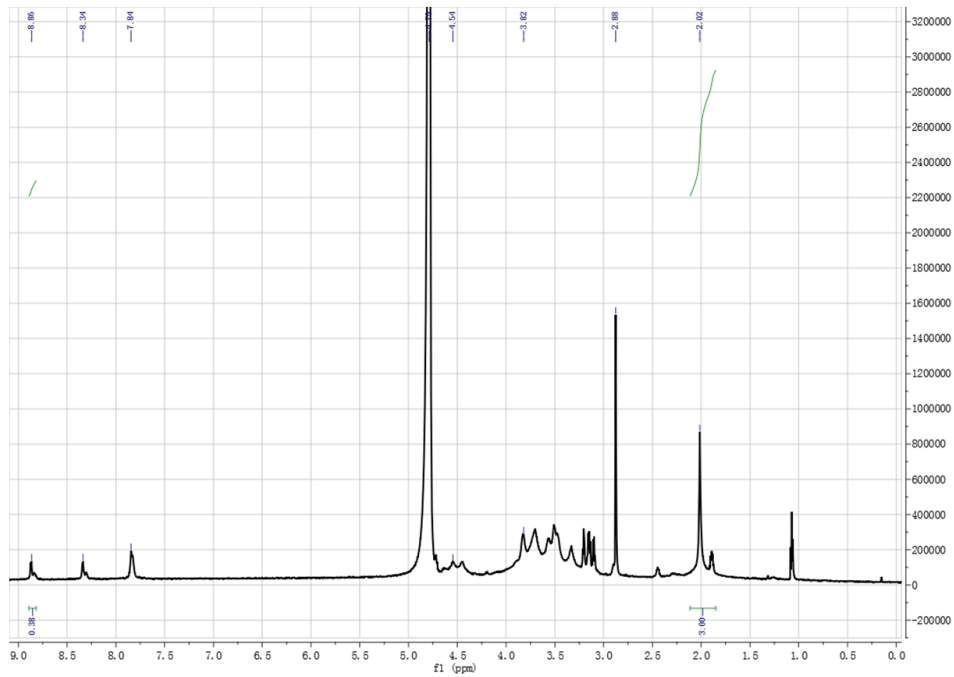

**b**

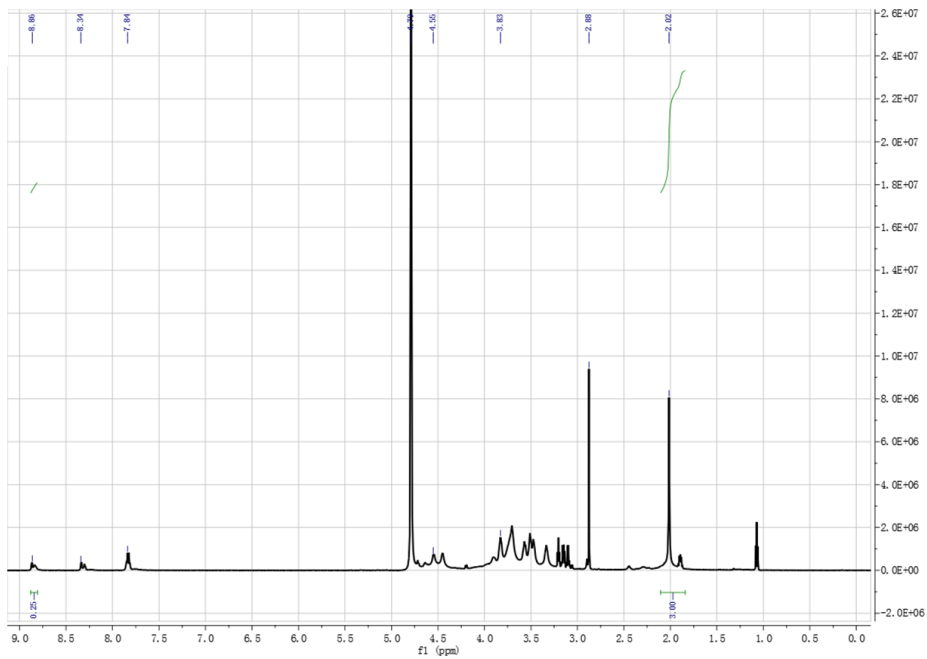

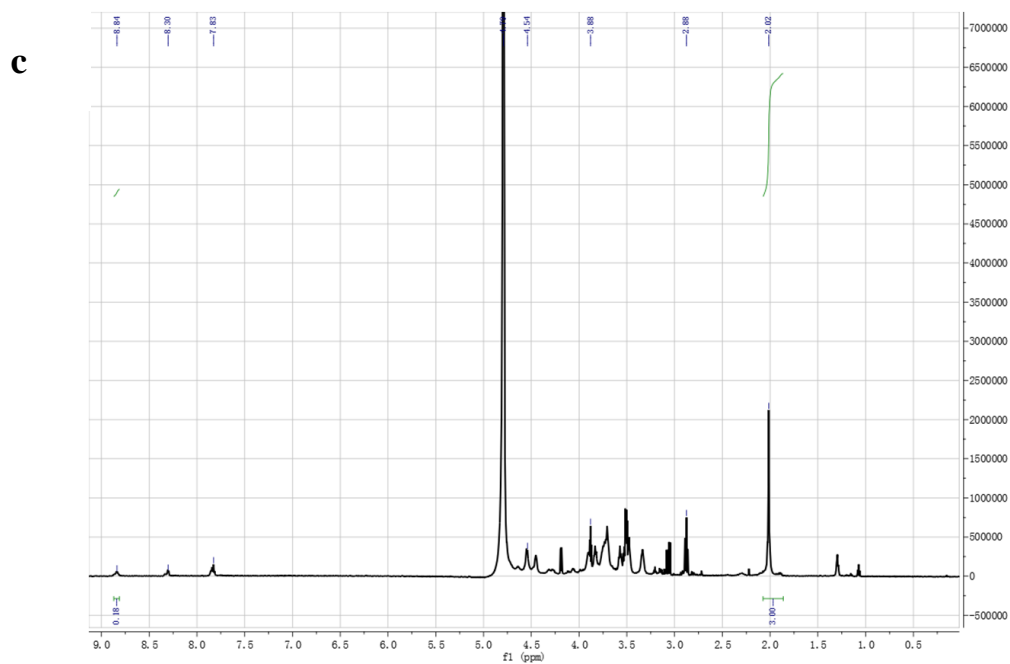

**Supplementary Figure 17.  $^1\text{H}$  NMR spectrum of different molecular weight HA modified BrBP.  $^1\text{H}$  NMR spectrum of (a)  $\text{HA}_{3\text{k}}\text{-BrBP}$  ( molecular weight of HA for 3k ) (b)  $\text{HA}_{10\text{w}}\text{-BrBP}$  ( molecular weight of HA for 100k ) and (c)  $\text{HA}_{1000\text{k}}\text{-BrBP}$  ( molecular weight of HA for 1000k ) in  $\text{D}_2\text{O}$  at 298 K.**

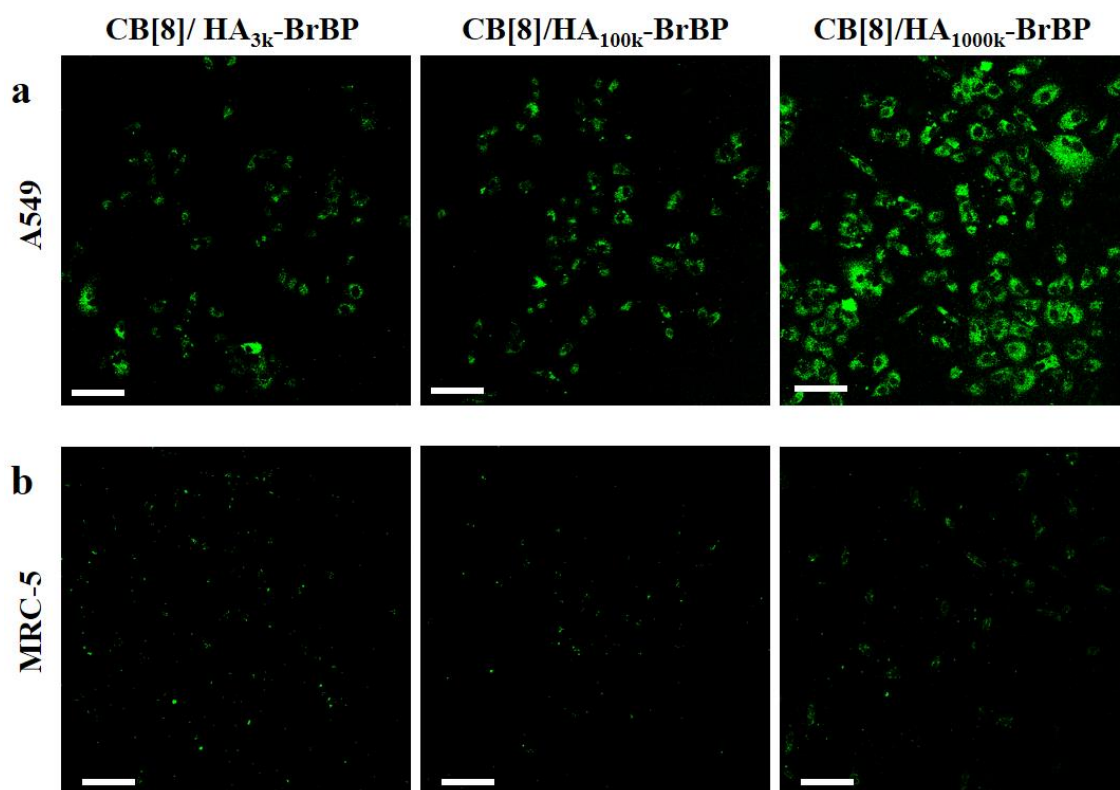

**Supplementary Figure 18. Confocal microscopy images of different molecular weight HA modified BrBP. (a)** A549 cells incubated with  $\text{HA}_{3\text{k}}\text{-BrBP}$ ,  $\text{HA}_{100\text{k}}\text{-BrBP}$  and  $\text{HA}_{1000\text{k}}\text{-BrBP}$ . **(b)** MRC-5 cells incubated with  $\text{HA}_{3\text{k}}\text{-BrBP}$ ,  $\text{HA}_{100\text{k}}\text{-BrBP}$  and  $\text{HA}_{1000\text{k}}\text{-BrBP}$  ( $[\text{BrBP}] = 25 \mu\text{M}$ ). (Scale bar = 100  $\mu\text{m}$ )

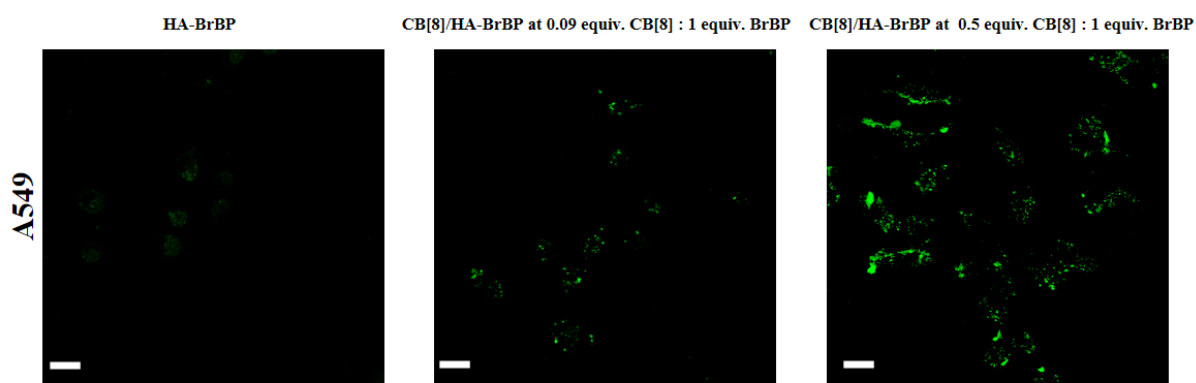

**Supplementary Figure 19. Confocal microscopy images of different amount of CB[8] on for the HA-BrBP.** A549 cells incubated with HA-BrBP, 0.09 equiv CB[8]/HA-BrBP and 0.5 equiv CB[8]/HA-BrBP ([BrBP] = 25  $\mu$ M). (Scale bar = 30  $\mu$ m)

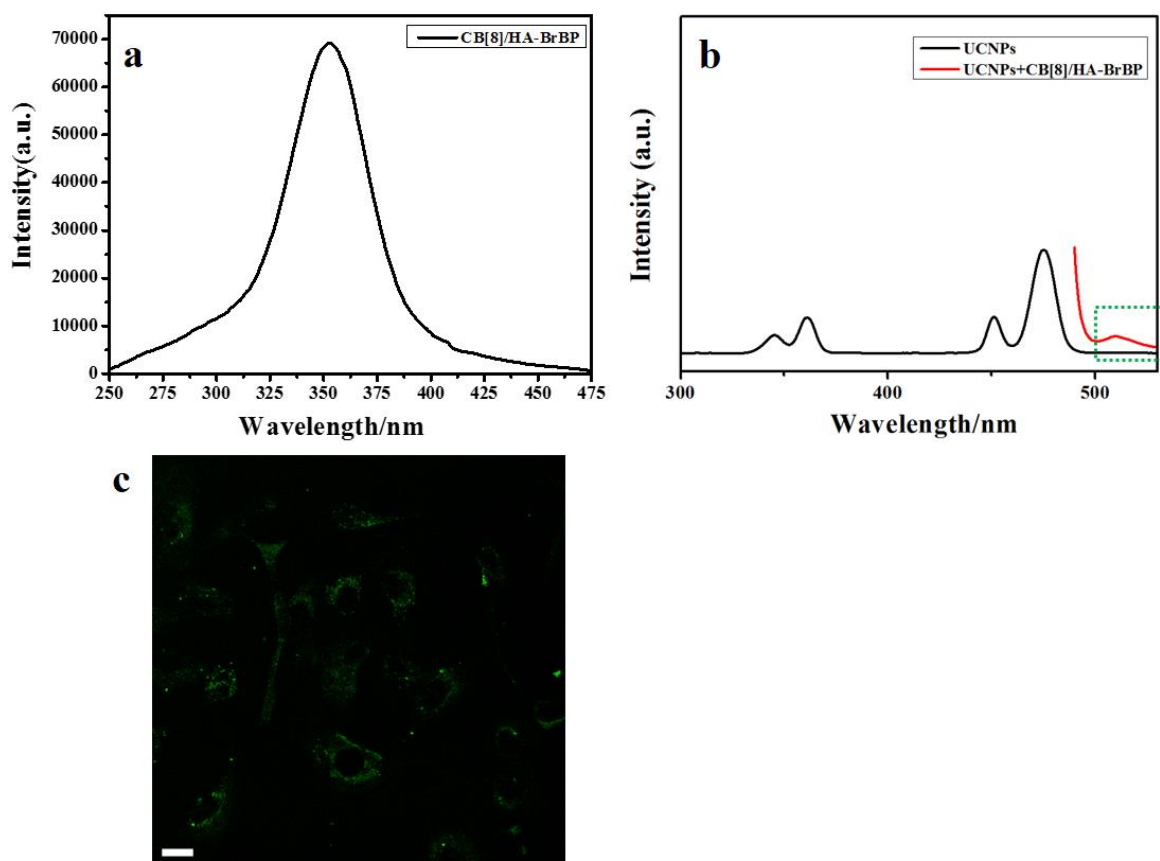

**Supplementary Figure 20. The Prompt photoluminescence contrast spectra of UCNP and UCNP/CB[8]/HA-BrBP.** (a) The excitation spectra of the CB[8]/HA-BrBP upon photoirradiation in aqueous solution at 298 K. (b) The prompt photoluminescence contrast spectra of UCNP (black) and UCNP/CB[8]/HA-BrBP (red) in water (298 K,  $\lambda_{\text{ex}} = 980$  nm). (c) Confocal microscopy images of HeLa cells incubated with UCNP/CB[8]/HA-BrBP ( $\lambda_{\text{ex}} = 488$  nm). UCNP (7.5 mg/mL, NaYREF<sub>4</sub>, RE: Yb, Er, Tm, Gd, Mu, Lu) was purchased from Hefei Fluonano Biotech Co., Ltd. (Scale bar = 30  $\mu$ m)
